# Supplementary material for: Connected subglacial lake drainage beneath Thwaites Glacier, West Antarctica
Source: Copernicus journal article supplement (doi:10.5194/tc-11-451-2017), 2017-02-08
Supplement: Supplementary file 1 [file tc-11-451-2017-supplement.zip]

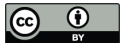

## *Supplement of*

# **Connected subglacial lake drainage beneath Thwaites Glacier, West Antarctica**

**Benjamin E. Smith et al.**

*Correspondence to:* Benjamin E. Smith (bsmith@apl.washington.edu)

- tc-11-451-2017-supplement-title-page.pdf
- Thw\_lakes\_supplemental\_data
  - Thw\_lakes\_outlines.dbf
  - Thw\_lakes\_outlines.gmt
  - Thw\_lakes\_outlines.prj
  - Thw\_lakes\_outlines.shp
  - Thw\_lakes\_outlines.shx
  - Thw\_lakes\_outlines.txt
  - Thw\_lakes\_supplemental\_figures.pdf
  - bed\_DEM.tif
  - elevation\_change\_data.tif
  - hpot\_estimate.tif
  - readme.txt
  - surface\_DEM.tif

The copyright of individual parts of the supplement might differ from the CC-BY 3.0 licence.
